## The glyoxalase system as an example of a cellular maintenance pathway with relevance to aging

Axel Kowald

Humboldt University Berlin, Institute for Biology, Theoretical Biophysics, Invalidenstrasse 42, 10115 Berlin, Germany

**Commentary on:** Scheckhuber CQ et al. Modulation of the glyoxalase system in the aging model *Podospora anserina*: effects on growth and lifespan. *Aging*. 2010; 2:969-980.

**Received:** 1/22/11; **Accepted** 1/23/11; **Published:** 1/2 /

**Correspondence to** Axel.Kowald@biologie.hu-berlin.de.

© Kowald. This is an open-access article distributed under the terms of the Creative Commons Attribution License, which permits unrestricted use, distribution, and reproduction in any medium, provided the original author and source are credited.

In a recent issue of AGING, Scheckhuber et al. studied the effect of methylglyoxal (MG) metabolism on growth and lifespan in *P. anserina* [1]. Methylglyoxal (2-oxopropanal) is generated enzymatically by three types of enzymes (methylglyoxal synthase, cytochrome P450 isozyme and amine oxidase) and non-enzymatically as a side product of glycolysis from dihydroxyacetone phosphate and glyceraldehyde-3-phosphat. MG reacts by Maillard reaction with lysine and arginine residues of proteins and thus leads to advanced glycosylation end products (AGE) [2]. It is removed enzymatically via the glyoxalase system, which consists of two enzymes [3].

On a glucose rich media, overexpression of only one of the two enzymes, *PaGlo1*, led to a reduction of lifespan, while overexpression of *PaGlo1* together with *PaGlo2*, increased lifespan. A situation reminiscent of the superoxide dismutase (SOD), catalase system that is involved in the detoxification of the superoxide radical. There, SOD converts the superoxide radical into hydrogen peroxide, which is then removed by catalase or glutathione peroxidase. Also in that case it has been observed that overexpressing only the first component (SOD) is detrimental instead of increasing resistance to oxidative stress [4,5,6].

In both cases an apparently simply reaction system displays phenotypes that are surprising and can be better understood when modelled mathematically in a systems biological context. Such an approach showed that an

alternative reaction pathway is required for the superoxide radical to explain the experimental findings [7] and thus provided a deeper understanding of the possible mechanism. Similarly, also the glyoxalase system might benefit from a modelling approach to test if the hypothesis that the negative effects of overexpressing *PaGlo1* alone are mediated via a reduction of free GSH, is plausible. It has also be shown that the mutagenic action of methylglyoxal involves the generation of free oxygen radicals [8]. Since GSH is also involved in the detoxification of reactive oxygen species, its decline would be detrimental for MG degradation as well as the removal of ROS that are generated by MG.

Numerical values are of critical importance for the construction of kinetic models and the absence of such values is often a serious obstacle. However, in erythrocytes the steady state concentrations and kinetic properties of the glyoxalase system have been determined [9,10], which opens the way for a systems biological approach. The work of Scheckhuber [1] thus provides interesting results for further investigations of a cellular maintenance pathway with relevance to aging.

### REFERENCES

1. Scheckhuber CQ, Mack SJ, Strobel I, Ricciardi F, Gispert S, Osiewacz HD. Modulation of the glyoxalase system in the aging model *Podospora anserina*: effects on growth and lifespan. *Aging* 2010; 2: 969-980.

2. Shamsi FA, Partal A, Sady C, Glomb M, Nagaraj RH. Immunological evidence for methylglyoxal-derived modifications in vivo. *J Biol Chem.* 1998; 273:6928-6936
3. Vander Jagt DL. *Glutathione: Chemical, Biochemical and Medical Aspects.* Wiley & Sons; 597-641
4. Schwartz PJ and Coyle JT. Effects of overexpression of the cytoplasmic copper-zinc superoxide dismutase on the survival of neurons in vitro. *Synapse* 1998;29:206-212.
5. Zhong W, Oberley LW, Oberley TD, et al. Inhibition of cell growth and sensitization to oxidative damage by overexpression of manganese superoxide dismutase in rat glioma cells. *Cell Growth Differentiation.* 1996; 7:1175-1186
6. Zintel S, Schwitalla D, Luce K, Hamann A, Osiewacz HD. Increasing mitochondrial superoxide dismutase abundance leads to impairments in protein quality control and ROS scavenging systems and to lifespan shortening. *Exp Gerontol.* 2010; 45:525-532.
7. Kowald A, Lehrach H, Klipp E. Alternative pathways as mechanism for the negative effects associated with overexpression of superoxide dismutase. *Journal of Theoretical Biology.* 2006; 238:828-840.
8. Yamaguchi T and Nakagawa K. Mutagenicity of and formation of oxygen radicals by trioses and glyoxal derivatives. *Agric Biol Chem.* 1983; 47:2461-2465.
9. Rae CD, Berners-Price SJ, Bulliman BT, Kuchel PW. Kinetic analysis of the human erythrocyte glyoxalase system using <sup>1</sup>H NMR and a computer model. *Eur J Biochem.* 1990; 193: 83-90.
10. Shih MJ, Edinger JW, Creighton DJ. Diffusion-dependent kinetic properties of glyoxalase I and estimates of the steady-state concentrations of glyoxalase-pathway intermediates in glycolyzing erythrocytes. *Eur J Biochem.* 1997; 244: 852-857.
